# Supplementary material for: Development, Validation, and Field-Testing of an Instrument for Clinical Assessment of HIV-Associated Neuropathy and Neuropathic Pain in Resource-Restricted and Large Population Study Settings
Source: PubMed Central journal article supplement (PMC5072607; doi:10.1371/journal.pone.0164994), 2016-10-20
Supplement: pone.0164994.s013.pdf [file pone.0164994.s013.pdf]

|                                   | Age - London (years; median, IQR) | Age - Johannesburg (years; median, IQR)   | Height - London (meters; median, IQR) | Height - Johannesburg (meters; median, IQR) | BMI - London (kg/m <sup>2</sup> ; median, IQR)                                                                                                                                                                                                                                                                                                                 | BMI - Johannesburg (kg/m <sup>2</sup> ; median, IQR) | Waist:Hip ratio - London (Males; median, IQR) | Waist:Hip ratio - Johannesburg (Males; median, IQR) | Waist:Hip ratio - London (Females; median, IQR)                                                                                                                                                                                                                              | Waist:Hip ratio - Johannesburg (Females; median, IQR) | F:M ratio - London | F:M ratio - Johannesburg | NRS (median, IQR) - London | DAPOS (median, IQR) - London | BPI (median, IQR) - London | ISI (median, IQR) - London |
|-----------------------------------|-----------------------------------|-------------------------------------------|---------------------------------------|---------------------------------------------|----------------------------------------------------------------------------------------------------------------------------------------------------------------------------------------------------------------------------------------------------------------------------------------------------------------------------------------------------------------|------------------------------------------------------|-----------------------------------------------|-----------------------------------------------------|------------------------------------------------------------------------------------------------------------------------------------------------------------------------------------------------------------------------------------------------------------------------------|-------------------------------------------------------|--------------------|--------------------------|----------------------------|------------------------------|----------------------------|----------------------------|
| <b>All</b>                        | 51 (45, 56)                       | 45.21 (39.76, 49.79)                      | 1.72 (1.71, 1.80)                     | 1.56 (1.52, 1.62)                           | 26.37 (22.88, 29.24)                                                                                                                                                                                                                                                                                                                                           | 26.49 (23.01, 30.11)                                 | 0.96 (0.91, 1.01)                             | 0.94 (0.88, 0.97)                                   | 0.89 (0.87, 0.93)                                                                                                                                                                                                                                                            | 0.87 (0.83, 0.91)                                     | 0.43               | 5.26                     | 2.5 (0.7)                  | 23.5 (19, 30)                | 10 (1, 24)                 | 11 (3.5, 17.5)             |
| <b>CHANT-ve</b>                   | 47 (32, 53)                       | 41.14 (35.60, 47.22)                      | 1.73 (1.66, 1.79)                     | 1.54 (1.5, 1.66)                            | 25.78 (23.76, 28.89)                                                                                                                                                                                                                                                                                                                                           | 26.92 (23.19, 30.39)                                 | 0.95 (0.90, 0.97)                             | 0.93 (0.93, 0.95)                                   | 0.89 (0.85, 0.90)                                                                                                                                                                                                                                                            | 0.87 (0.85, 0.89)                                     | 0.54               | 4.76                     | 0 (0, 3)                   | 25 (16.5, 30)                | 2 (0, 9)                   | 6 (0, 16)                  |
| <b>CHANT+ve</b>                   | 55.5 (48, 61)                     | 46.66 (41.59, 51.92)                      | 1.74 (1.68, 1.83)                     | 1.57 (1.54, 1.62)                           | 26.08 (22.89, 29.24)                                                                                                                                                                                                                                                                                                                                           | 28.04 (23.24, 35.34)                                 | 0.99 (0.91, 1.05)                             | 0.95 (0.85, 1.04)                                   | 0.92 (0.88, 1.04)                                                                                                                                                                                                                                                            | 0.87 (0.82, 0.91)                                     | 0.30               | 5.56                     | 7 (2.5, 8.25)              | 23 (23, 31)                  | 24 (6.5, 45.5)             | 13 (8, 18)                 |
| <b>CHANT+ve, BFP+ve</b>           | 51 (47, 58)                       | 47.57 (41.17, 52.38)                      | 1.71 (1.66, 1.84)                     | 1.57 (1.53, 1.61)                           | 25.92 (23.38, 32.41)                                                                                                                                                                                                                                                                                                                                           | 28.33 (23.29, 32.38)                                 | 0.92 (0.91, 1.04)                             | 0.95 (0.85, 1.04)                                   | 0.92 (0.88, 1.04)                                                                                                                                                                                                                                                            | 0.86 (0.82, 0.91)                                     | 0.50               | 4.54                     | 8 (4, 8.75)                | 26 (19, 35.5)                | 43 (11.5, 47)              | 16 (12, 21.5)              |
| <b>CHANT+ve, BFP+ve, DN4-I+ve</b> | 53 (41, 58)                       | 46.94 (41.17, 52.24)                      | 1.72 (1.63, 1.85)                     | 1.58 (1.53, 1.62)                           | 25.21 (21.61, 30.11)                                                                                                                                                                                                                                                                                                                                           | 28.33 (23.29, 32.38)                                 | 0.91 (0.91, 1.02)                             | 0.95 (0.85, 1.04)                                   | 0.92 (0.88, 1.04)                                                                                                                                                                                                                                                            | 0.86 (0.80, 0.90)                                     | 0.17               | 5.00                     | 8 (6, 9)                   | 27 (19, 34)                  | 43.5 (24, 47)              | 17 (11, 25)                |
|                                   | <b>CD4 count (Median, IQR)</b>    | <b>Viral load (copies/ml) Median, IQR</b> |                                       |                                             | <b>Current antiretroviral drugs</b>                                                                                                                                                                                                                                                                                                                            |                                                      |                                               |                                                     | <b>Legends for drug names</b>                                                                                                                                                                                                                                                |                                                       |                    |                          |                            |                              |                            |                            |
| <b>London cohort</b>              | 589.5 (435.5, 765)                | 11205.5 (114, 192449)                     |                                       |                                             | DRV, RTV = 3%; ABC, 3TC, NVP = 3%; FTC, TFV, TAZ, RTV, EVG = 3%; EFV, FTC, TFV = 23%; TFV, FTC, TAZ, RTV = 17%; LPV, RTV = 3%; DRV, RTV, MVC = 3%; FTC, TFV, RPV = 7%; FTC, TFV, DRV, RTV = 3%; ETR, ABC, 3TC = 3%; TFV, FTC, NVP = 3%; ABC, 3TC, EFV = 3%; ABC, 3TC, DRV, RTV = 3%; FTC, TFV, RAL, EFV = 3%; RAL, ETR, RTV, DRV = 3%; TAZ, RAL, RTV, NVP = 3% |                                                      |                                               |                                                     | DRV = darunavir; RTV = ritonavir; ABC = Abacavir; 3TC = lamivudine; NVP = nevirapine; FTC = emtricitabine; TFV = tenofovir; TAZ = atazanavir; EVG = elvitegravir; EFV = efavirenz; LPV = lopinavir; MVC = maraviroc; RPV = rilpivirine; ETR = etravirine; RAL = raltegravir; |                                                       |                    |                          |                            |                              |                            |                            |
| <b>Johannesburg cohort</b>        | 485 (296, 722)                    | Not available                             |                                       |                                             | D4T/3TC/EFV = 17%; TDF/3TC/LPVr = 9%; TDF/3TC/EFV = 35%; TDF/FTC/EFV = 4%; ABC/3TC/LPVr = 2%; AZI/3TC/EFV = 13%; ABC/3TC/EFV = 4%; TDF/3TC/NVP = 2%; AZI/3TC/LPVr = 9%                                                                                                                                                                                         |                                                      |                                               |                                                     |                                                                                                                                                                                                                                                                              |                                                       |                    |                          |                            |                              |                            |                            |
