# Supplementary material for: Development, Validation, and Field-Testing of an Instrument for Clinical Assessment of HIV-Associated Neuropathy and Neuropathic Pain in Resource-Restricted and Large Population Study Settings
Source: PubMed Central journal article supplement (PMC5072607; doi:10.1371/journal.pone.0164994), 2016-10-20
Supplement: pone.0164994.s014.pdf [file pone.0164994.s014.pdf]

| Compared cohorts                                     | Dunn's Multiple Comparison Test<br><i>p</i> -value |
|------------------------------------------------------|----------------------------------------------------|
| DN4-I (CHANT+, BFP+, DN4-I+) vs DN4-I (CHANT+, BFP+) | $p > 0.05$                                         |
| DN4-I (CHANT+, BFP+, DN4-I+) vs DN4-I (CHANT+)       | $p > 0.05$                                         |
| DN4-I (CHANT+, BFP+, DN4-I+) vs DN4-I (CHANT-)       | $p \leq 0.001$                                     |
| DN4-I (CHANT+, BFP+, DN4-I+) vs DN4-I, all           | $p \leq 0.05$                                      |
| DN4-I (CHANT+, BFP+) vs DN4-I (CHANT+)               | $p > 0.05$                                         |
| DN4-I (CHANT+, BFP+) vs DN4-I (CHANT-)               | $p \leq 0.001$                                     |
| DN4-I (CHANT+, BFP+) vs DN4-I, all                   | $p \leq 0.05$                                      |
| DN4-I (CHANT+) vs DN4-I (CHANT-)                     | $p \leq 0.001$                                     |
| DN4-I (CHANT+) vs DN4-I, all                         | $p \leq 0.05$                                      |
| DN4-I (CHANT-) vs DN4-I, all                         | $p > 0.05$                                         |
