# Supplementary material for: Development, Validation, and Field-Testing of an Instrument for Clinical Assessment of HIV-Associated Neuropathy and Neuropathic Pain in Resource-Restricted and Large Population Study Settings
Source: PubMed Central journal article supplement (PMC5072607; doi:10.1371/journal.pone.0164994), 2016-10-20
Supplement: pone.0164994.s015.pdf [file pone.0164994.s015.pdf]

| NPSI among CHANT+ve AND Body Map +ve                                                        | 0               | 1                | 2                 | 3            | 4 | 5 | 6 | 7 | 8 | 9 | 10 |
|---------------------------------------------------------------------------------------------|-----------------|------------------|-------------------|--------------|---|---|---|---|---|---|----|
| Q1: Does your pain feel like burning?                                                       | ✓✓✓✓            |                  | ✓                 | ✓            |   | ✓ |   | ✓ | ✓ |   |    |
| Q2: Does your pain feel like squeezing?                                                     | ✓✓✓✓<br>✓       |                  | ✓                 |              |   | ✓ |   |   |   | ✓ |    |
| Q3: Does your pain feel like pressure?                                                      | ✓✓              | ✓                | ✓                 | ✓            |   |   |   | ✓ | ✓ |   | ✓  |
| Q5: Does your pain feel like electric shocks?                                               | ✓✓✓             |                  |                   | ✓            | ✓ | ✓ |   | ✓ | ✓ |   | ✓  |
| Q6: Does your pain feel like stabbing?                                                      | ✓✓✓             |                  | ✓                 | ✓            |   |   | ✓ |   | ✓ | ✓ | ✓  |
| Q8. Is your pain provoked or increased by brushing on the painful area?                     | ✓✓✓✓            |                  | ✓✓                |              |   |   |   |   | ✓ | ✓ | ✓  |
| Q9. Is your pain provoked or increased by pressure on the painful area?                     | ✓✓              |                  |                   | ✓            |   |   | ✓ | ✓ | ✓ | ✓ | ✓  |
| Q10. Is your pain provoked or increased by contact with something cold on the painful area? | ✓✓✓✓            |                  | ✓✓                |              |   | ✓ |   |   | ✓ | ✓ |    |
| Q11. Do you feel pins and needles?                                                          | ✓               | ✓                |                   | ✓            |   | ✓ | ✓ | ✓ | ✓ |   | ✓  |
| Q12. Do you feel tingling?                                                                  | ✓               | ✓✓               |                   |              | ✓ |   | ✓ | ✓ | ✓ |   | ✓  |
|                                                                                             |                 |                  |                   |              |   |   |   |   |   |   |    |
|                                                                                             |                 |                  |                   |              |   |   |   |   |   |   |    |
|                                                                                             | Between 1 - 3h  | Between 4 and 7h | Between 8 and 12h | Permanently  |   |   |   |   |   |   |    |
| Q4: <i>During the past 24 hours</i> , your spontaneous pain has been present:               | ✓✓✓             | ✓✓               | ✓                 | ✓✓✓          |   |   |   |   |   |   |    |
|                                                                                             | Between 1 and 5 | Between 6 and 10 | Between 11 and 20 | More than 20 |   |   |   |   |   |   |    |
| Q7: <i>During the past 24 hours</i> , how many of these pain attacks have you had?          | ✓✓              | ✓✓✓✓<br>✓✓       |                   | ✓            |   |   |   |   |   |   |    |
